# Profile of the *in silico* secretome of the palm dieback pathogen, a fungus that puts natural oases at risk

Maryam Rafiqi<sup>1</sup>, Lukas Jelonek<sup>2</sup>, Aliou M. Diouf<sup>1</sup>, AbdouLahat Mbaye<sup>1</sup>, Martijn Rep<sup>3</sup> and Alhousseine Diarra<sup>4</sup>

1. Institute of Bioinformatics and Systems Biology, Justus Liebig University, Giessen, Germany

2. Plant Pathology Program, Agrobiosciences, University Mohammed VI Polytechnic (UM6P), Benguerir, Morocco

3. Swammerdam Institute for Life Sciences, Faculty of Science, University of Amsterdam, The Netherlands

4. Digital 4 Research Labs, Mohammed VI Polytechnic University (UM6P), Benguerir, Morocco

## Abstract

Understanding biotic changes that occur alongside climate change constitute a research priority of global significance. Here, we address a plant pathogen that poses a serious threat to life on natural oases, where climate change is already taking a toll and severely impacting human subsistence. *Fusarium oxysporum* f. sp. *albedinis* is a pathogen that causes dieback disease on date palms, a tree that provides several critical ecosystem services in natural oases; and consequently, of major importance in this vulnerable habitat. Here, we assess the current state of global pathogen spread, we annotate the genome of a sequenced pathogen strain isolated from the native range and we analyse its *in silico* secretome. The palm dieback pathogen secretes a large arsenal of effector candidates including a variety of toxins, a distinguished profile of secreted in xylem proteins (SIX) as well as an expanded protein family with an N-terminal conserved motif [SG]PC[KR]P that could be involved in interactions with host membranes. Using agrobiodiversity as a strategy to decrease pathogen infectivity, while providing short term resilient solutions, seems to be widely overcome by the pathogen. Hence, the urgent need for future mechanistic research on the palm dieback disease and a better understanding of pathogen genetic diversity.

## Main

Global climate has changed rapidly over recent decades, and climate-change predictions in some water-limited regions, such as westernmost Mediterranean (Iberia and Morocco), North Africa and Middle East, forecast a significant shift in the near future, with less frequent precipitation and hotter and longer drought events (Varela et al., 2020, Weniger et al., 2019). An impact of climate change has already been observed on biodiversity and crop productivity; and consequently, on human livelihoods in affected areas (Wheeler & von Braun, 2013). Because of its desert location, vulnerable ecosystem and farming practices, oases are at major risk (Mohamed et al., 2021).

Alongside abiotic stresses caused by global warming, natural oases are increasingly facing threats by emerging infectious plant diseases, notably those caused by fungal and oomycete pathogens (Table 1). In terms of yield losses, fungi are the most destructive emerging pathogens in oases, posing a serious threat to food security and oasis ecosystem health. While many emerging diseases in oasis ecosystems are encountered in other agroecological zones (Fones et al., 2020), a few diseases are exclusively of oasis origin. One such disease is dieback of palm, also known as Bayoud, caused by the ascomycete fungus *Fusarium oxysporum* f. sp. *albedinis*. The palm dieback pathogen has been identified in the late 19<sup>th</sup> century in the oasis of Zagora, Southern Morocco (Louvet & Toutain, 1973), but it has only started to spread rapidly in recent decades. Palm dieback has now been detected in many palm-growing areas across Africa, Asia and America (Sedra, 2013, Corte, 1973, Feather, 1979, Ibrahim Elkhail Benzohra, 2015, Mirza Hussain Samo, 2020), with North Africa being the most affected. An estimated 15 million palm trees in oasis habitats of Morocco and Algeria have now been completely wiped out by the palm dieback disease, which continues to progress at an alarming rate despite prophylactic measures to contain pathogen spread (Mirza Hussain Samo, 2020). When outbreaks of palm dieback take a pandemic scale, natural habitats collapse entirely (Figure1), severely impacting human livelihoods, economy and subsistence in populated oases.

Date palm (*Phoenix dactylifera*) is a distinct species that belong to the palm family (Arecaceae of the monocotyledon order Arecales) (ros-Balthazard M., 2020a). Date Palms are pivotal components of natural oasis ecosystems, where they provide many ecosystem services, such as protection from silting

and desertification, cooling oasis temperature, creating a suitable microclimate that supports the development of other crops, changing soil-water dynamics, and supporting wildlife as well as providing food and animal feed. Through these diversified ecosystem services, date palm contributes to the long-term functioning and, notably, the resilience of oasis ecosystems to natural and anthropogenic perturbations (de Grenade, 2013). Most date palm cultivars are susceptible to the dieback disease and have already succumbed in North Africa despite efforts of restoration (Sedra, 2013, Ibrahim Elkhailil Benzohra, 2015). Palm dieback disease is jeopardising the genetic diversity of date palm in affected oases, especially when spreading at an epidemiological rate, wiping out groves and, sometimes, entire oases (Figure 1A). Besides, the number of palm trees lost to dieback disease may be underestimated, as farmers stop irrigating entire groves and regions of the oases where the disease has erupted as an effort to limit pathogen spread, thereby killing not only domesticated but also date palm's wild relatives that represent a reservoir of genetic diversity, which is needed for agricultural improvement.

Palm dieback disease is characterised by discolouration from green to whitish of one palm leaf of the middle crown, followed by necrosis on the dorsal side of the rachis that progresses from the base to the tip of the frond, corresponding to mycelia progression in the vascular bundles of the rachis. After one leaf has been infected, adjacent leaves show the same succession of symptoms. This leads to crown dieback and ultimately the death of infected trees (Zaid, 2002) (Figure B). All commercialised date palm cultivars seem to be equally susceptible to the disease, which affects young offshoots as well as over 200-year-old palms. Albeit alarmingly destructive, pathogenesis of the disease is as yet uninvestigated and molecular details of how *F. oxysporum* f. sp. *albedinis* brings about infection of palm trees are still unknown. Secretome profiling and predictive ranking of effector candidates of this pathogen have, so far, not been addressed in research. It is therefore timely to address the palm dieback pathosystem in order to understand how the disease takes place and, subsequently develop disease control strategies that can save date palm trees and natural oases. Here, we annotate the draft genome of Foa strain 133 (Khayil et al., 2020), we mine its secretome, we analyse its large repertoire of effector candidates, and we briefly discuss research areas that should be the focus of future studies in order to get insights into Foa's molecular mechanisms of pathogenicity.

## Results and discussion

### Annotation and secretome profiling of *F. oxysporum* f. sp. *albedinis*

To mine the secretome of the palm dieback-causing agent *F. oxysporum* f. sp. *albedinis* (Foa), we annotated the draft genome of the Foa 133 strain (Khayri et al., 2020), as described in the methods section. Annotation of the identified 16887 genes is summarised in supplemental data1. The secretome was determined by processing predicted protein datasets through an in-silico secretion pipeline (Figure 2). In this study, the secretome is defined as proteins that are predicted to be secreted extracellularly through the classical ER secretory pathway, do not target mitochondria and do not integrate into the membrane through transmembrane domains (TMs). Of the predicted 16887 genes, 1464 were predicted to code for secreted proteins, of which 1077 (73%) contained less than 500 amino acids and 598 proteins had no identified pfam domain (Table 2). Annotation of all secreted proteins is presented in table S1. Foa secretome harbours a large arsenal, 386, of carbohydrate active enzymes (CAZymes) that are predicted to be active in the apoplast, contributing mainly to plant cell wall degradation. These predicted CAZymes are distributed among glycoside hydrolases (GH), auxiliary activities (AA), carbohydrate esterases (CE), pectin lyases (PL), carbohydrate binding modules (CBM) and glycosyl transferases (GT) families, harbouring 209, 107, 26, 37, 9 and 3 members, respectively. 73 GH and CE proteins are accompanied by CBM modules (table S2). 550 predicted secreted proteins contain cysteines that are predicted to form disulphide bridges. Of these, 437 proteins contain at least two predicted disulphide bonds ( table S3). 313 secreted proteins were predicted to carry a wide range of enzymatic functions. 370 proteins (25%) contain repeats, carrying two or more copies of a tandemly or non-tandemly duplicated sequence or structural motif that is at least five amino acid residues in length. We have not considered degenerate sequence repeats that may be identifiable only through analysis of protein tertiary structure. Proteins carrying LysM domains were also recovered in the secretome. One protein (FUN\_010192-T1) carried *Alternaria alternata* allergen 1 pfam domain PF16541.4.

### A diversified group of necrosis-inducing proteins among candidate effectors of *F. oxysporum* f. sp. *albedinis*

Within fungal secretomes, effectors have been widely investigated for their role in fungal virulence and disease development in plants (Rafiqi et al., 2012, Selin et al., 2016, He et al., 2020). Typically, fungal effector proteins are predicted to function either in the interface between pathogen and host cell structures, or inside host cells, where they manipulate molecular processes in the host in favour of disease development. When they are intercepted by the host immune system, these effectors are called avirulence proteins because their recognition by the host surveillance system limits pathogen virulence and spread (Rafiqi et al., 2012, Vincent et al., 2020, He et al., 2020). Such effectors are under diversification selection to circumvent the host immune surveillance and, therefore, evolve relatively fast, making their prediction challenging. Currently, many thousands of effector candidates have been predicted in genomes of filamentous pathogens and their expression profiles have been analysed, yet for any identified fungal pathogen only a few fungal effectors have been functionally characterised and shown to play a role in fungus-plant interactions (Sánchez-Vallet et al., 2018, Vincent et al., 2020). Nevertheless, certain features have been found to be shared between fungal effectors that make their prediction, albeit inaccurate, possible. Such features include harbouring a signal peptide for secretion outside fungal structures, small size, cysteine content (Saunders et al., 2012, Lu & Edwards, 2016, de Wit, 2016, Jones et al., 2021), a higher sequence diversity than rest of genes (McMullan et al., 2018) or, in rare cases, also harbouring conserved motifs (Liu et al., 2019). To enable uncovering of potential virulence proteins deployed by *Foa* to invade date palm tissue, we have identified candidate effectors within *Foa* secretome based on cysteine content (at least 2 counts of predicted disulphide bonds) and using EffectorP 2.0 (Sperschneider et al., 2018) (supplemental data 2). We found that candidate effector proteins account for 30% of the *Foa* secretome. Among these, we recovered three homologues of necrosis-inducing toxins called Nep1-like proteins (NLPs), which contain the nlp24 peptide with its two conserved regions I (11-aa immunogenic part) and II (the heptapeptide GHRHDWE motif) (Fellbrich et al., 2002). Three other candidate effectors with predicted phytotoxicity and homology to *Cladosporium fulvum* Ecp2 effector (Hce2) (Stergiopoulos et al., 2010) were recovered in *Foa* secretome (Table 3).

Necrosis-inducing secreted proteins have been found in a range of plant-associated microorganisms, including oomycetes, fungi and bacteria and tend to cause necrosis mostly in dicotyledonous plants

(Nazar Pour et al., 2020, Gijzen & Nurnberger, 2006). It is unclear whether NLPs identified in Foa genome are causing the necrosis observed in infected monocotyledonous date palm rachises. In Fungi, ascomycetes are known to secrete NLPs that contain six conserved cysteine residues. Interestingly, one of Foa's predicted NLPs possesses 2 cysteine residues (Table 3), making necrosis-inducing secreted proteins intriguing candidates for experiments to investigate their role in virulence.

Other secreted proteins with putative cytotoxic functions include candidate effectors of predicted S1/P1 Nuclease (FUN\_003983-T1) and Ribonucleases T2 (FUN\_001364-T1 and FUN\_008322-T1) families, that might either act intracellularly as a cytotoxin by scavenging host nucleic acids (Pennington et al., 2019, L. Balabanova, 2012) or extracellularly to inactivate the damage-associated molecular pattern extracellular DNA (Widmer, 2018).

#### ***F. oxysporum* f. sp. *albedinis* harbours a distinct profile of SIX genes**

Fourteen effectors referred to as secreted in xylem (SIX) proteins, some with a proven role in virulence, have been identified in *F. oxysporum* f. sp. *lycopersici* (Rep et al., 2004, Lievens et al., 2009, Thatcher et al., 2012). In tomato and cucurbit-infecting strains, SIX genes were found to be located on small, dispensable accessory chromosomes. Horizontal transfer of these chromosomes from pathogenic lineages of *F. oxysporum* to a non-pathogenic recipient isolate of *F. oxysporum* renders the latter pathogenic on the respective host (van Dam et al., 2017, Ma et al., 2010). Four sequences similar to SIX effectors were recovered from the draft genome of Foa 133 strain. Two sequences are variants of SIX1 and two other sequences are similar to SIX9 and SIX11 (supplemental data 3). Based on this finding, the profile of SIX genes in Foa 133 isolate is distinct from previously identified SIX gene profiles in *formae speciales* of *F. oxysporum*, supporting the hypothesis that each *forma specialis* possesses a unique combination of effectors. However, as only a single Foa strain has so far been sequenced, more population genomics and functional studies will be needed to determine the profile and the function of SIX genes in *F. oxysporum* f. sp. *albedinis*.

#### **[SG]PC[KR]P effector candidates**

We screened the entire predicted secretome of Foa 133 for conserved motifs that have previously been identified in predicted effectors of other filamentous plant pathogens, such as RxLR (Morgan & Kamoun, 2007, Whisson et al., 2007), YxSL[RK] (Levesque et al., 2010), [YFW]xC (Godfrey et al., 2010), [LI]XAR (Yoshida et al., 2009), [RK]CxxCx<sub>12</sub>H (Yoshida et al., 2009), G[I/F/Y][A/L/S/T]R (Catanzariti et al., 2006) and DELD (Zuccaro et al., 2011). While some of these short motifs are frequently found in many Foa secreted proteins, they do not occur at the correct position within Foa secreted proteins and may simply be due to artifacts of random background matches (motif occurrence is included in table S1). On the other hand, 34 putative effectors in Foa's secretome carry the conserved motif [SG]PC[KR]P immediately following the predicted signal peptide for secretion (supplemental data 4). This motif has, so far, only been detected in *Fusarium* proteins (Sperschneider et al., 2013). Effector candidates with this motif seem to be rapidly evolving and have been suggested to play a role in pathogenesis (Sperschneider et al., 2015), though functional studies have not as yet been published. [SG]PC[KR]P effector candidates have been identified in the secretomes of *F. graminearum*, *F. pseudograminearum*, *F. oxysporum* and *F. solani* secretomes (Sperschneider et al., 2013). In all four species, all proteins carrying this motif also contain cysteines. In Foa's secretome, [SG]PC[KR]P candidate effectors are predicted to be heavily glycosylated and phosphorylated. They also carry repeats of PAN/apple domains. The PAN/apple domain (PF00024, PF14295) is enriched in the secretomes of oomycete species and is associated with carbohydrate-binding modules, such as cellulose-binding elicitor lectins (CBEL), which also elicit strong host immune responses when infiltrated into host (tobacco) and non-host plants, including *Arabidopsis thaliana* (McGowan et al., 2020, Mesarich et al., 2015, McGowan & Fitzpatrick, 2017, Sejalón-Delmas et al., 1997, Mateos et al., 1997). On the other hand, PAN/apple modules are also involved in protein-protein interactions (Tordai et al., 1999). They are found on *Toxoplasma* cell surface binding receptors that are involved in cell entry (Gong et al., 2012, Brecht et al., 2001). A noted feature of PAN/apple domain-containing proteins is a conserved pattern of cysteine residues. Seven of the 34 identified Foa [SG]PC[KR]P effector candidates are not predicted to carry any disulphide bond, but are still predicted to carry several CBMs, suggesting a binding activity. Based on homology detection and structure prediction by HMM-HMM comparison (HHpred), [SG]PC[KR]P effector candidates are overall predicted to have a hydrolase activity and to interact with



components of the plant cell membrane. This interaction is likely to be mediated through N-terminal noncatalytic CBM domains, whose role could be to bring [SG]PC[KR]P proteins in close proximity to their substrates. In addition, HHpred prediction highlights homology signatures to several membrane-interacting and pore-forming proteins, such as bacterial adhesins, vegetative insecticidal proteins Vip3 and Vip4, viral capsid proteins, and cellulosomal scaffoldin adaptor protein B (table S4).

In *Foa* 133 genome, [SG]PC[KR]P motif seems to occur exclusively in secreted proteins. Only three non-secreted proteins, FUN\_007157-T1, FUN\_010458-T1 and FUN\_010145-T1 carry [SG]PC[KR]P motif, although not at the right position. Interestingly, one of these hypothetical proteins, FUN\_010458-T1, is also predicted to carry two PAN domains. Based on these bioinformatics predictions, we hypothesize that [SG]PC[KR]P effectors could form a machinery of proteins, such as cellulosome or equivalent, in *F. oxysporum* f. sp. *albedinis*, and perhaps also in other *Fusarium* species. A complex consisting of a variety of different enzymes bound to noncatalytic scaffolding subunits with a role of binding mediators, which can each bind, perhaps specifically hence sequence diversity, to one of the various plant cell surface anchoring proteins. [SG]PC[KR]P proteins will be part of our priority list for mechanistic and functional studies in the date palm dieback pathosystem.

## Conclusions

Palm dieback disease is killing date palms, the cornerstone of life in Saharan oases, and posing a threat to biodiversity as well as to human subsistence and livelihoods in populated oases. We could isolate numerous *Foa* strains from diseased palms in all five oases we sampled in Morocco (data not shown), indicating a very wide spread of the pathogen within its native range. Palm dieback disease is progressing at an alarming rate, moving West to East across north Africa and reaching as far as the Middle East and Pakistan (Figure 3) (Mirza Hussain Samo, 2020). In an effort to protect date palm cultivars of economic importance and restore it to oases landscapes, millions of genetically diverse palm trees demonstrating different levels of tolerance to the highly destructive palm dieback pandemic have been planted over the last two decades across Morocco's oases under agroforestry systems (Essarioui, 2020). However, while diversifying host populations has the potential to challenge the pathogen infectivity through variation in host susceptibility, disease progress and spread of infection depends



equally on the level of genetic diversity in the pathogen population (Ganz & Ebert, 2010). As such, future research should aim at analysing pathogen strains across infected areas and address more empirical studies. In order to get insights into the mechanisms of infection deployed by Foa to invade palm tissue, we annotated the recently released genome of Foa strain 133 and we analysed its *in silico* secretome, including putative secreted effectors. Two particular sets of secreted proteins, SGPCR and SIX effector candidates, are specific to *Fusarium oxysporum* but have their contribution to the pathogen's virulence as yet uncharacterised. These proteins will be prime candidates for our future studies. Several other effector candidates have predicted cytoplasmic functions and are suggested to be transferred into infected plant cells. These effector candidates are likely to be required more during the initial biotrophic growth of the pathogen than upon its later necrotrophic development. Interestingly, we could isolate Foa strains from many symptom-free palms (data not shown). *Fusarium* species are likely to have had a long evolutionary history with North African palm trees and may associate with this host in a range of different interactions spanning the spectrum from harmless endophytism to pathogenesis. What caused the outbreak of palm dieback in recent decades is as yet unknown. The increased frequency of severe long and hot drought events in Saharan oases under and ever-changing climate may render the palm dieback pathogen harder to detect and mitigate at the onset of disease development. It is, therefore, timely to address both biochemical and genomics studies in order to elucidate palm dieback disease function and help save date palms, which in turn will help conserve oasis ecosystems.

## Materials and Methods

### Annotation of *Fusarium oxysporum* f. sp. *albedinis* strain 133

We used the assembled genome of *Fusarium oxysporum* f. sp. *albedinis* strain 133 (Khayati et al., 2020). Gene prediction and annotation were carried out using funannotate pipeline v1.8.1 (Stajich, 2020), which includes masking, ab initio gene-prediction training, using Augustus and Genemark, with the EST dataset reported to the Ganoderma mycocosm repository, gene prediction, and the assignment of functional annotation to protein-coding gene models.

## Secretome prediction

We used a pipeline described previously (Saunders et al., 2012, Rafiqi et al., 2013) to predict fungal secretomes. Briefly, the pipeline filters a set of proteins that contain signal peptides using SignalP 4. 1f (Nielsen, 2017). This set of predicted secreted proteins were further used in the pipeline to predict transmembrane helices with TMHMM 2.0c (Krogh et al., 2001) and cellular localisation signals with TargetP 1.1b (Emanuelsson et al., 2000). Sequences that contained transmembrane helices or mitochondrial targeting signal were removed from the set of interest. The remaining proteins were annotated with: Hmmer (Zhang et al., 2018) against PfamScan (Finn et al., 2014) for domain information, Targetp (Almagro Armenteros et al., 2019) for subcellular localisation, Predictnls (Cokol et al., 2000) for detection of nuclear localization signals, T-Reks (Jorda & Kajava, 2009) for repeat identification, Disulfinder (database: uniprotkb/swiss-prot) for disulfide bond prediction, MOTIF search for the search of known motifs. The positions of the motifs RxLR, [LI]xAR, [RK]CxxCx{12}H, [YFW]xC, YxSL[RK], G[IFY][ALST]R, DELD and [SG]PC[KR]P are identified with a script based on regular expressions.

## Homology detection and structure prediction

To search for homologues and compare their predicted structure, a workflow that contains the non-modelling steps of the hhpred-website (Zimmermann et al., 2018, Gabler et al., 2020) was implemented. The sequences were scanned with hhblits against uniref30 and pfam to obtain similar sequences, multiple alignments and hmms of the hits and the query sequences were generated, followed by a search of the hmms in pdb with hhsearch. Data were then extracted from hits (see supplemental table S4) and used for the analysis.

## Acknowledgment

This work was supported by University Mohammed VI Polytechnic (UM6P). We thank Dr. Toby Gibson and Dr. Manjeet Kumar for help with effector short linear motif and function predictions. We acknowledge technical assistance by the bioinformatics and systems biology facility of JLU Giessen and the BiGi service center. We thank our field guides in Moroccan oases Dr. M. A. El Houmaizi and Mohamed Bo.

## References

- Almagro Armenteros JJ, Salvatore M, Emanuelsson O, *et al.*, 2019. Detecting sequence signals in targeting peptides using deep learning. *Life science alliance* **2**, e201900429.
- Brecht S, Carruthers VB, Ferguson DJ, *et al.*, 2001. The toxoplasma micronemal protein MIC4 is an adhesin composed of six conserved apple domains. *J Biol Chem* **276**, 4119-27.
- Catanzariti AM, Dodds PN, Lawrence GJ, Ayliffe MA, Ellis JG, 2006. Haustorially expressed secreted proteins from flax rust are highly enriched for avirulence elicitors. *Plant Cell* **18**, 243-56.
- Cokol M, Nair R, Rost B, 2000. Finding nuclear localization signals. *EMBO Rep* **1**, 411-5.
- Corte A, 1973. La traceomicosi da Fusarium oxysporum f. sp. albedinis della Phoenix canariensis. *Notiz. Malattie Piante* **88-89**, 107-17.
- De Grenade R, 2013. Date palm as a keystone species in Baja California peninsula, Mexico oases. *Journal of Arid Environments* **94**, 59-67.
- De Wit PJ, 2016. Cladosporium fulvum Effectors: Weapons in the Arms Race with Tomato. *Annu Rev Phytopathol* **54**, 1-23.
- Emanuelsson O, Nielsen H, Brunak S, Von Heijne G, 2000. Predicting subcellular localization of proteins based on their N-terminal amino acid sequence. *J Mol Biol* **300**, 1005-16.
- Essarioui AM, Reda; Mokrini, Fouad, 2020. Resource competitive interactions as mechanism of date palm Bayoud disease suppression. *Moroccan Journal of Agricultural Sciences*.
- Feather TVaM, H.D., 1979. Wilt and dieback of Canary Island palm in California. *California Agriculture* **33**, 19-20.
- Fellbrich G, Romanski A, Varet A, *et al.*, 2002. NPP1, a Phytophthora-associated trigger of plant defense in parsley and Arabidopsis. *Plant J* **32**, 375-90.
- Finn RD, Bateman A, Clements J, *et al.*, 2014. Pfam: the protein families database. *Nucleic Acids Research* **42**, D222-D30.
- Fones HN, Bebbler DP, Chaloner TM, Kay WT, Steinberg G, Gurr SJ, 2020. Threats to global food security from emerging fungal and oomycete crop pathogens. *Nature Food* **1**, 332-42.
- Gabler F, Nam SZ, Till S, *et al.*, 2020. Protein Sequence Analysis Using the MPI Bioinformatics Toolkit. *Curr Protoc Bioinformatics* **72**, e108.
- Ganz HH, Ebert D, 2010. Benefits of host genetic diversity for resistance to infection depend on parasite diversity. *Ecology* **91**, 1263-8.
- Gijzen M, Nurnberger T, 2006. Nep1-like proteins from plant pathogens: recruitment and diversification of the NPP1 domain across taxa. *Phytochemistry* **67**, 1800-7.
- Godfrey D, Bohlenius H, Pedersen C, Zhang Z, Emmersen J, Thordal-Christensen H, 2010. Powdery mildew fungal effector candidates share N-terminal Y/F/WxC-motif. *BMC Genomics* **11**, 317.
- Gong H, Kobayashi K, Sugi T, *et al.*, 2012. A novel PAN/apple domain-containing protein from Toxoplasma gondii: characterization and receptor identification. *PLoS One* **7**, e30169.
- He Q, McLellan H, Boevink PC, Birch PRJ, 2020. All Roads Lead to Susceptibility: The Many Modes of Action of Fungal and Oomycete Intracellular Effectors. *Plant Commun* **1**, 100050.
- Ibrahim Elkhail Benzohra MMaRB, 2015. Bayoud disease of date palm in Algeria: History, epidemiology and integrated disease management. *African Journal of Biotechnology* **14**, 542-50.
- Jones DaB, Rozano L, Debler JW, Mancera RL, Moolhuijzen PM, Hane JK, 2021. An automated and combinative method for the predictive ranking of candidate effector proteins of fungal plant pathogens. *Scientific Reports* **11**, 19731.
- Jorda J, Kajava AV, 2009. T-REKS: identification of Tandem REpeats in sequences with a K-meanS based algorithm. *Bioinformatics* **25**, 2632-8.
- Khay S, Khoulassa S, Gaboun F, *et al.*, 2020. Draft Genome Sequence of Fusarium oxysporum f. sp. albedinis Strain Foa 133, the Causal Agent of Bayoud Disease on Date Palm. *Microbiol Resour Announc* **9**.
- Krogh A, Larsson B, Von Heijne G, Sonnhammer EL, 2001. Predicting transmembrane protein topology with a hidden Markov model: application to complete genomes. *J Mol Biol* **305**, 567-80.

L. Balabanova MPaVR, 2012. The Distribution and Substrate Specificity of Extracellular Nuclease Activity in Marine Fungi,. *Open Journal of Marine Science* **2**, 188-95.

Levesque CA, Brouwer H, Cano L, *et al.*, 2010. Genome sequence of the necrotrophic plant pathogen *Pythium ultimum* reveals original pathogenicity mechanisms and effector repertoire. *Genome Biol* **11**, R73.

Lievens B, Houterman PM, Rep M, 2009. Effector gene screening allows unambiguous identification of *Fusarium oxysporum* f. sp. *lycopersici* races and discrimination from other formae speciales. *FEMS Microbiol Lett* **300**, 201-15.

Liu L, Xu L, Jia Q, *et al.*, 2019. Arms race: diverse effector proteins with conserved motifs. *Plant Signal Behav* **14**, 1557008.

Louvet J, Toutain G, 1973. Nouvelles observations sur la fusariose du palmier dattier et précisions concernant la lutte. *Ann Phytopathol* **5**, 35-52.

Lu S, Edwards MC, 2016. Genome-Wide Analysis of Small Secreted Cysteine-Rich Proteins Identifies Candidate Effector Proteins Potentially Involved in *Fusarium graminearum*-Wheat Interactions. *Phytopathology* **106**, 166-76.

Ma LJ, Van Der Does HC, Borkovich KA, *et al.*, 2010. Comparative genomics reveals mobile pathogenicity chromosomes in *Fusarium*. *Nature* **464**, 367-73.

Mateos FV, Rickauer M, Esquerre-Tugaye MT, 1997. Cloning and characterization of a cDNA encoding an elicitor of *Phytophthora parasitica* var. *nicotianae* that shows cellulose-binding and lectin-like activities. *Mol Plant Microbe Interact* **10**, 1045-53.

Mcgowan J, Fitzpatrick DA, 2017. Genomic, Network, and Phylogenetic Analysis of the Oomycete Effector Arsenal. *mSphere* **2**.

Mcgowan J, O'hlanon R, Owens RA, Fitzpatrick DA, 2020. Comparative Genomic and Proteomic Analyses of Three Widespread *Phytophthora* Species: *Phytophthora chlamydospora*, *Phytophthora gonapodyides* and *Phytophthora pseudosyringae*. *Microorganisms* **8**.

Mcmullan M, Rafiqi M, Kaithakottil G, *et al.*, 2018. The ash dieback invasion of Europe was founded by two genetically divergent individuals. *Nat Ecol Evol* **2**, 1000-8.

Mesarich CH, Bowen JK, Hamiaux C, Templeton MD, 2015. Repeat-containing protein effectors of plant-associated organisms. *Front Plant Sci* **6**, 872.

Mirza Hussain Samo NJI, 2020. solation and characterization of *Fusarium oxysporum* f. Sp. *albedinis* causing bayoud disease of date palm tree from Gambat, district Khairpur, Sindh, Pakistan. **04** 43-7.

Mohamed A-E-M, Abderrahim B, Raja B-L, *et al.*, 2021. Vulnerability of Oasis Agriculture to Climate Change in Morocco. In: Ahmed K, Kirby B, Michael R, Mirza Barjees B, eds. *Impacts of Climate Change on Agriculture and Aquaculture*. Hershey, PA, USA: IGI Global, 76-106.

Morgan W, Kamoun S, 2007. RXLR effectors of plant pathogenic oomycetes. *Curr Opin Microbiol* **10**, 332-8.

Nazar Pour F, Cobos R, Rubio Coque JJ, *et al.*, 2020. Toxicity of Recombinant Necrosis and Ethylene-Inducing Proteins (NLPs) from *Neofusicoccum parvum*. *Toxins (Basel)* **12**.

Nielsen H, 2017. Predicting Secretory Proteins with SignalP. *Methods Mol Biol* **1611**, 59-73.

Pennington HG, Jones R, Kwon S, *et al.*, 2019. The fungal ribonuclease-like effector protein CSEP0064/BEC1054 represses plant immunity and interferes with degradation of host ribosomal RNA. *PLoS pathogens* **15**, e1007620-e.

Rafiqi M, Ellis JG, Ludowici VA, Hardham AR, Dodds PN, 2012. Challenges and progress towards understanding the role of effectors in plant-fungal interactions. *Curr Opin Plant Biol* **15**, 477-82.

Rafiqi M, Jelonek L, Akum N, Zhang F, Kogel K-H, 2013. Effector candidates in the secretome of *Piriformospora indica*, a ubiquitous plant-associated fungus. *Frontiers in Plant Science* **4**.

Rep M, Van Der Does HC, Meijer M, *et al.*, 2004. A small, cysteine-rich protein secreted by *Fusarium oxysporum* during colonization of xylem vessels is required for I-3-mediated resistance in tomato. *Mol Microbiol* **53**, 1373-83.

Ros-Balthazard M. BWJ, Leitch I., Pellicer K., Powell R.F., Bellot S., 2020a. Systematics and evolution of the genus *Phoenix*: towards understanding the date palm's origins. *ResearchGate*.

Sánchez-Vallet A, Fouché S, Fudal I, *et al.*, 2018. The Genome Biology of Effector Gene Evolution in Filamentous Plant Pathogens. *Annu Rev Phytopathol* **56**, 21-40.

Saunders DG, Win J, Cano LM, Szabo LJ, Kamoun S, Raffaele S, 2012. Using hierarchical clustering of secreted protein families to classify and rank candidate effectors of rust fungi. *PLoS One* **7**, e29847.

Sedra MH, 2013. The Bayoud (Vascular Wilt) of Date Palm in North Africa: Situation, Research Achievements and Applications *Acta Horticulturae*, 59–75.

Sejalón-Delmas N, Mateos FV, Bottin A, Rickauer M, Dargent R, Esquerre-Tugaye MT, 1997. Purification, Elicitor Activity, and Cell Wall Localization of a Glycoprotein from *Phytophthora parasitica* var. *nicotianae*, a Fungal Pathogen of Tobacco. *Phytopathology* **87**, 899-909.

Selin C, De Kievit TR, Belmonte MF, Fernando WG, 2016. Elucidating the Role of Effectors in Plant-Fungal Interactions: Progress and Challenges. *Front Microbiol* **7**, 600.

Sperschneider J, Dodds PN, Gardiner DM, Singh KB, Taylor JM, 2018. Improved prediction of fungal effector proteins from secretomes with EffectorP 2.0. *Mol Plant Pathol* **19**, 2094-110.

Sperschneider J, Gardiner DM, Taylor JM, Hane JK, Singh KB, Manners JM, 2013. A comparative hidden Markov model analysis pipeline identifies proteins characteristic of cereal-infecting fungi. *BMC Genomics* **14**, 807.

Sperschneider J, Gardiner DM, Thatcher LF, *et al.*, 2015. Genome-Wide Analysis in Three *Fusarium* Pathogens Identifies Rapidly Evolving Chromosomes and Genes Associated with Pathogenicity. *Genome Biol Evol* **7**, 1613-27.

Stajich JPA, 2020. Funannotate v1.8.1: Eukaryotic genome annotation (v1.8.1). *Zenodo*.

Stergiopoulos I, Van Den Burg HA, Okmen B, *et al.*, 2010. Tomato Cf resistance proteins mediate recognition of cognate homologous effectors from fungi pathogenic on dicots and monocots. *Proc Natl Acad Sci U S A* **107**, 7610-5.

Thatcher LF, Gardiner DM, Kazan K, Manners JM, 2012. A highly conserved effector in *Fusarium oxysporum* is required for full virulence on *Arabidopsis*. *Mol Plant Microbe Interact* **25**, 180-90.

Tordai H, Banyai L, Patthy L, 1999. The PAN module: the N-terminal domains of plasminogen and hepatocyte growth factor are homologous with the apple domains of the prekallikrein family and with a novel domain found in numerous nematode proteins. *FEBS Lett* **461**, 63-7.

Van Dam P, Fokkens L, Ayukawa Y, *et al.*, 2017. A mobile pathogenicity chromosome in *Fusarium oxysporum* for infection of multiple cucurbit species. *Sci Rep* **7**, 9042.

Varela R, Rodríguez-Díaz L, Decastro M, 2020. Persistent heat waves projected for Middle East and North Africa by the end of the 21st century. *PLoS One* **15**, e0242477.

Vincent D, Rafiqi M, Job D, 2020. The Multiple Facets of Plant–Fungal Interactions Revealed Through Plant and Fungal Secretomics. *Frontiers in Plant Science* **10**.

Weniger GC, De Andrés-Herrero M, Bolin V, *et al.*, 2019. Late Glacial rapid climate change and human response in the Westernmost Mediterranean (Iberia and Morocco). *PLoS One* **14**, e0225049.

Wheeler T, Von Braun J, 2013. Climate change impacts on global food security. *Science* **341**, 508-13.

Whisson SC, Boevink PC, Moleleki L, *et al.*, 2007. A translocation signal for delivery of oomycete effector proteins into host plant cells. *Nature* **450**, 115-8.

Widmer H. Functional characterisation of a fungal endonuclease effector and regulated host cell death, 2018.

Yoshida K, Saitoh H, Fujisawa S, *et al.*, 2009. Association genetics reveals three novel avirulence genes from the rice blast fungal pathogen *Magnaporthe oryzae*. *Plant Cell* **21**, 1573-91.

Zaid ADW, P. F.; Djerbi, M.; Oihabi, A., 2002. Diseases And Pests Of Date Palm. 227–82.

Zhang H, Yohe T, Huang L, *et al.*, 2018. dbCAN2: a meta server for automated carbohydrate-active enzyme annotation. *Nucleic Acids Res* **46**, W95-W101.

Zimmermann L, Stephens A, Nam SZ, *et al.*, 2018. A Completely Reimplemented MPI Bioinformatics Toolkit with a New HHpred Server at its Core. *J Mol Biol* **430**, 2237-43.

Zuccaro A, Lahrmann U, Guldener U, *et al.*, 2011. Endophytic life strategies decoded by genome and transcriptome analyses of the mutualistic root symbiont *Piriformospora indica*. *PLoS Pathog* **7**, e1002290.



## Legend

### Figure 1. Dieback of date palm in a natural oasis in Morocco

(a) Date palm tree showing dieback on the crown. (b) Healthy date palm. (c) Palm dieback disease taking a pandemic scale and leading to ecological collapse of a Moroccan oasis

### Figure 2. Overview of the computational pipeline used to mine predictive secreted proteins in *F. oxysporum* f. sp. *albedinis* genome

### Figure 3. Geographic distribution of the palm dieback disease caused by *F. oxysporum* f. sp. *albedinis*

Map was developed using ArcGIS 10.8 with layer from natural earth dataset.  
<http://www.naturalearthdata.com/>



**Predicted proteins 16887**

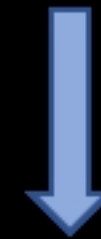

**Predicted proteins with signal peptide 1920**

**401 Secreted proteins with transmembrane helices**

**73 Secreted proteins with mitochondrial targeting signal**

**18 Secreted proteins with transmembrane domains and mitochondrial signal**

**The predicted secretome 1464**

Figure 2

**Legend:**

-  = oases with date palm plantations.  
Iran, Israel, Libya, Oman, Peru, Syria, United Arab Emirates, Bahrain, Egypt, Iraq,  
Kuwait, Qatar, Saudia Arabia, Sudan, Yemen, Chad, Mali, Niger, Australia, Palestine Territories, China
-  = areas where *F. oxysporum* f. sp. *albedinis* has been detected.  
Morocco, Tunisia, Algeria, Mauritania, Jordan, Canary Islands, Pakistan

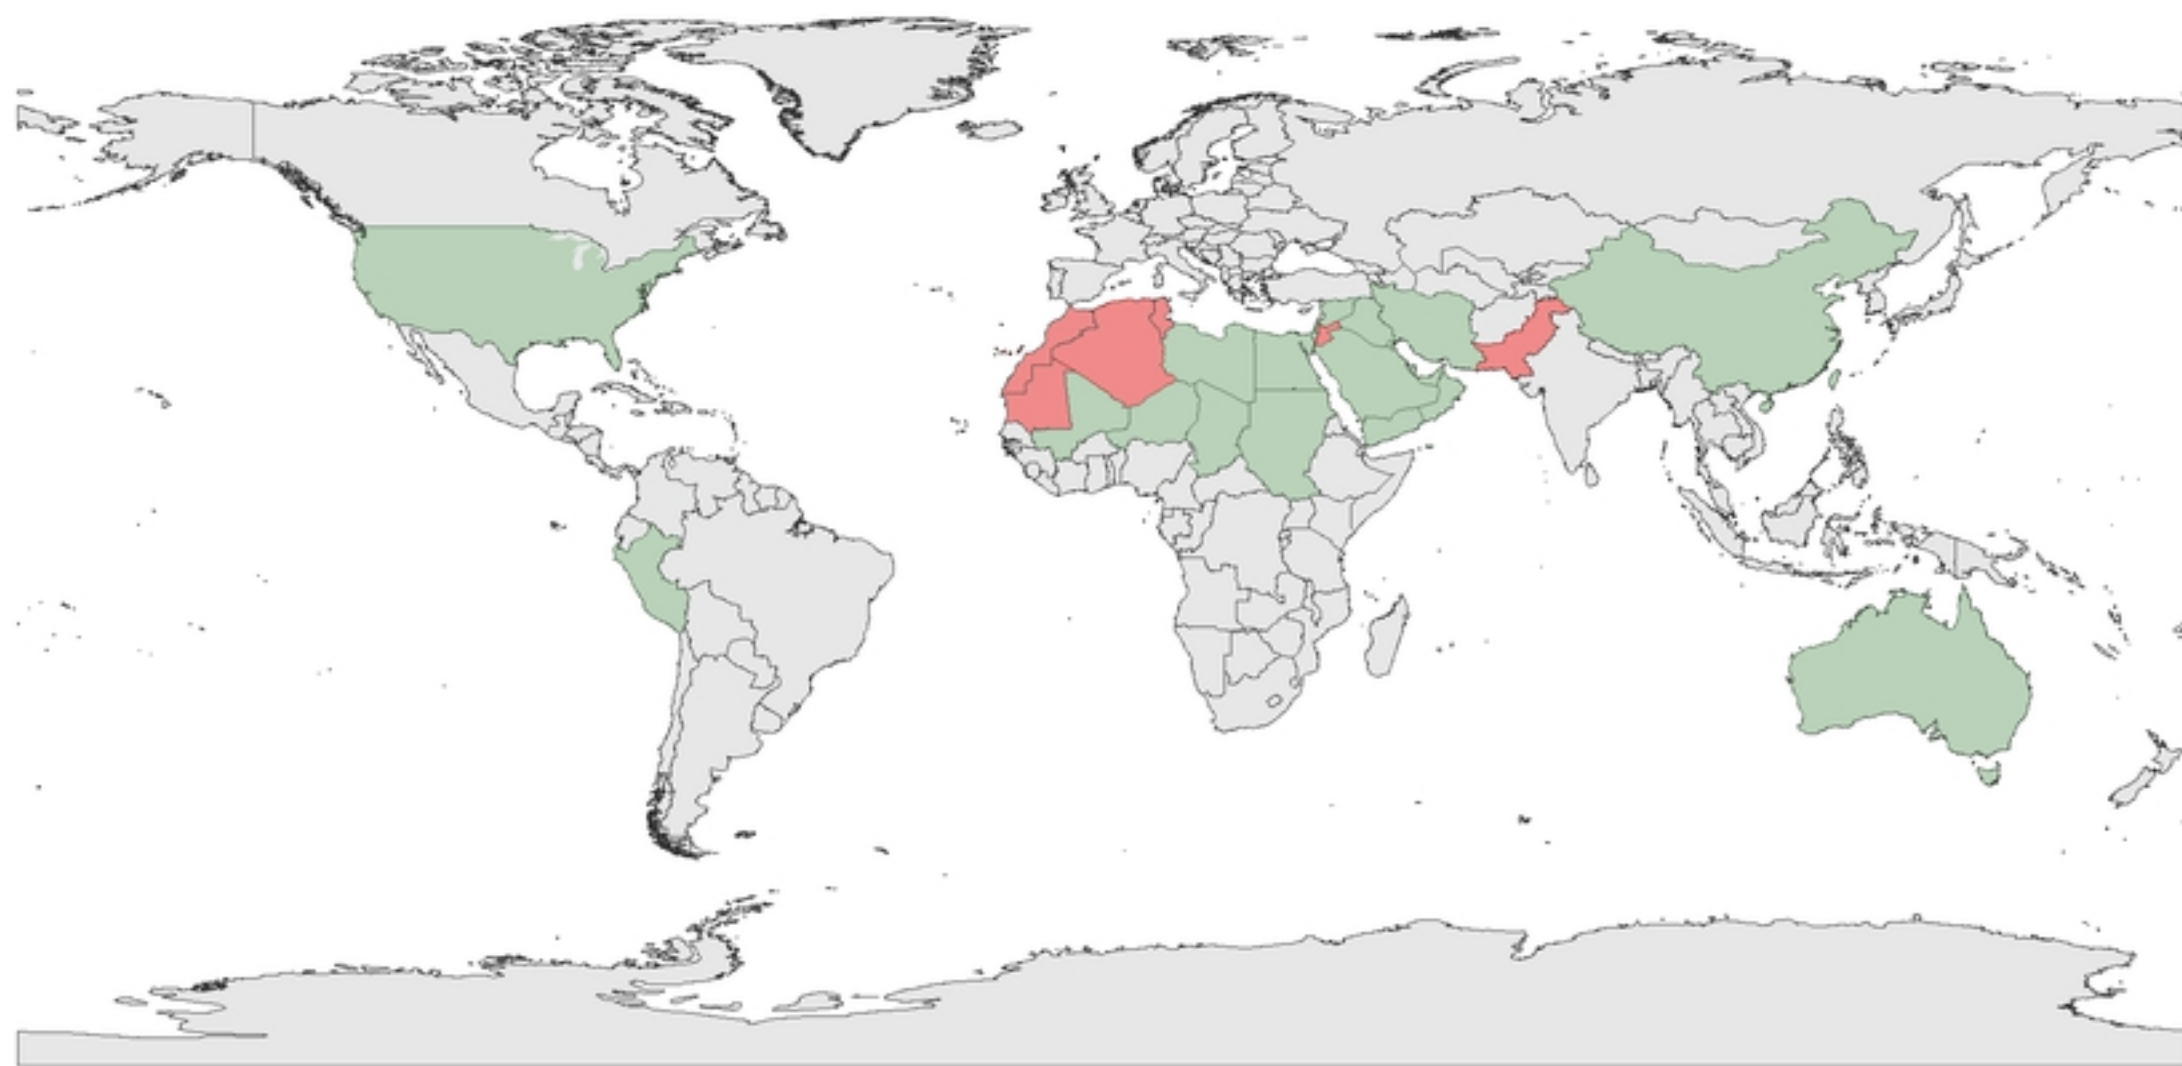

Figure 3



A

bioRxiv preprint doi: <https://doi.org/10.1101/2021.11.18.469146>; this version posted November 18, 2021. The copyright holder for this preprint (which was not certified by peer review) is the author/funder, who has granted bioRxiv a license to display the preprint in perpetuity. It is made available under aCC-BY 4.0 International license.

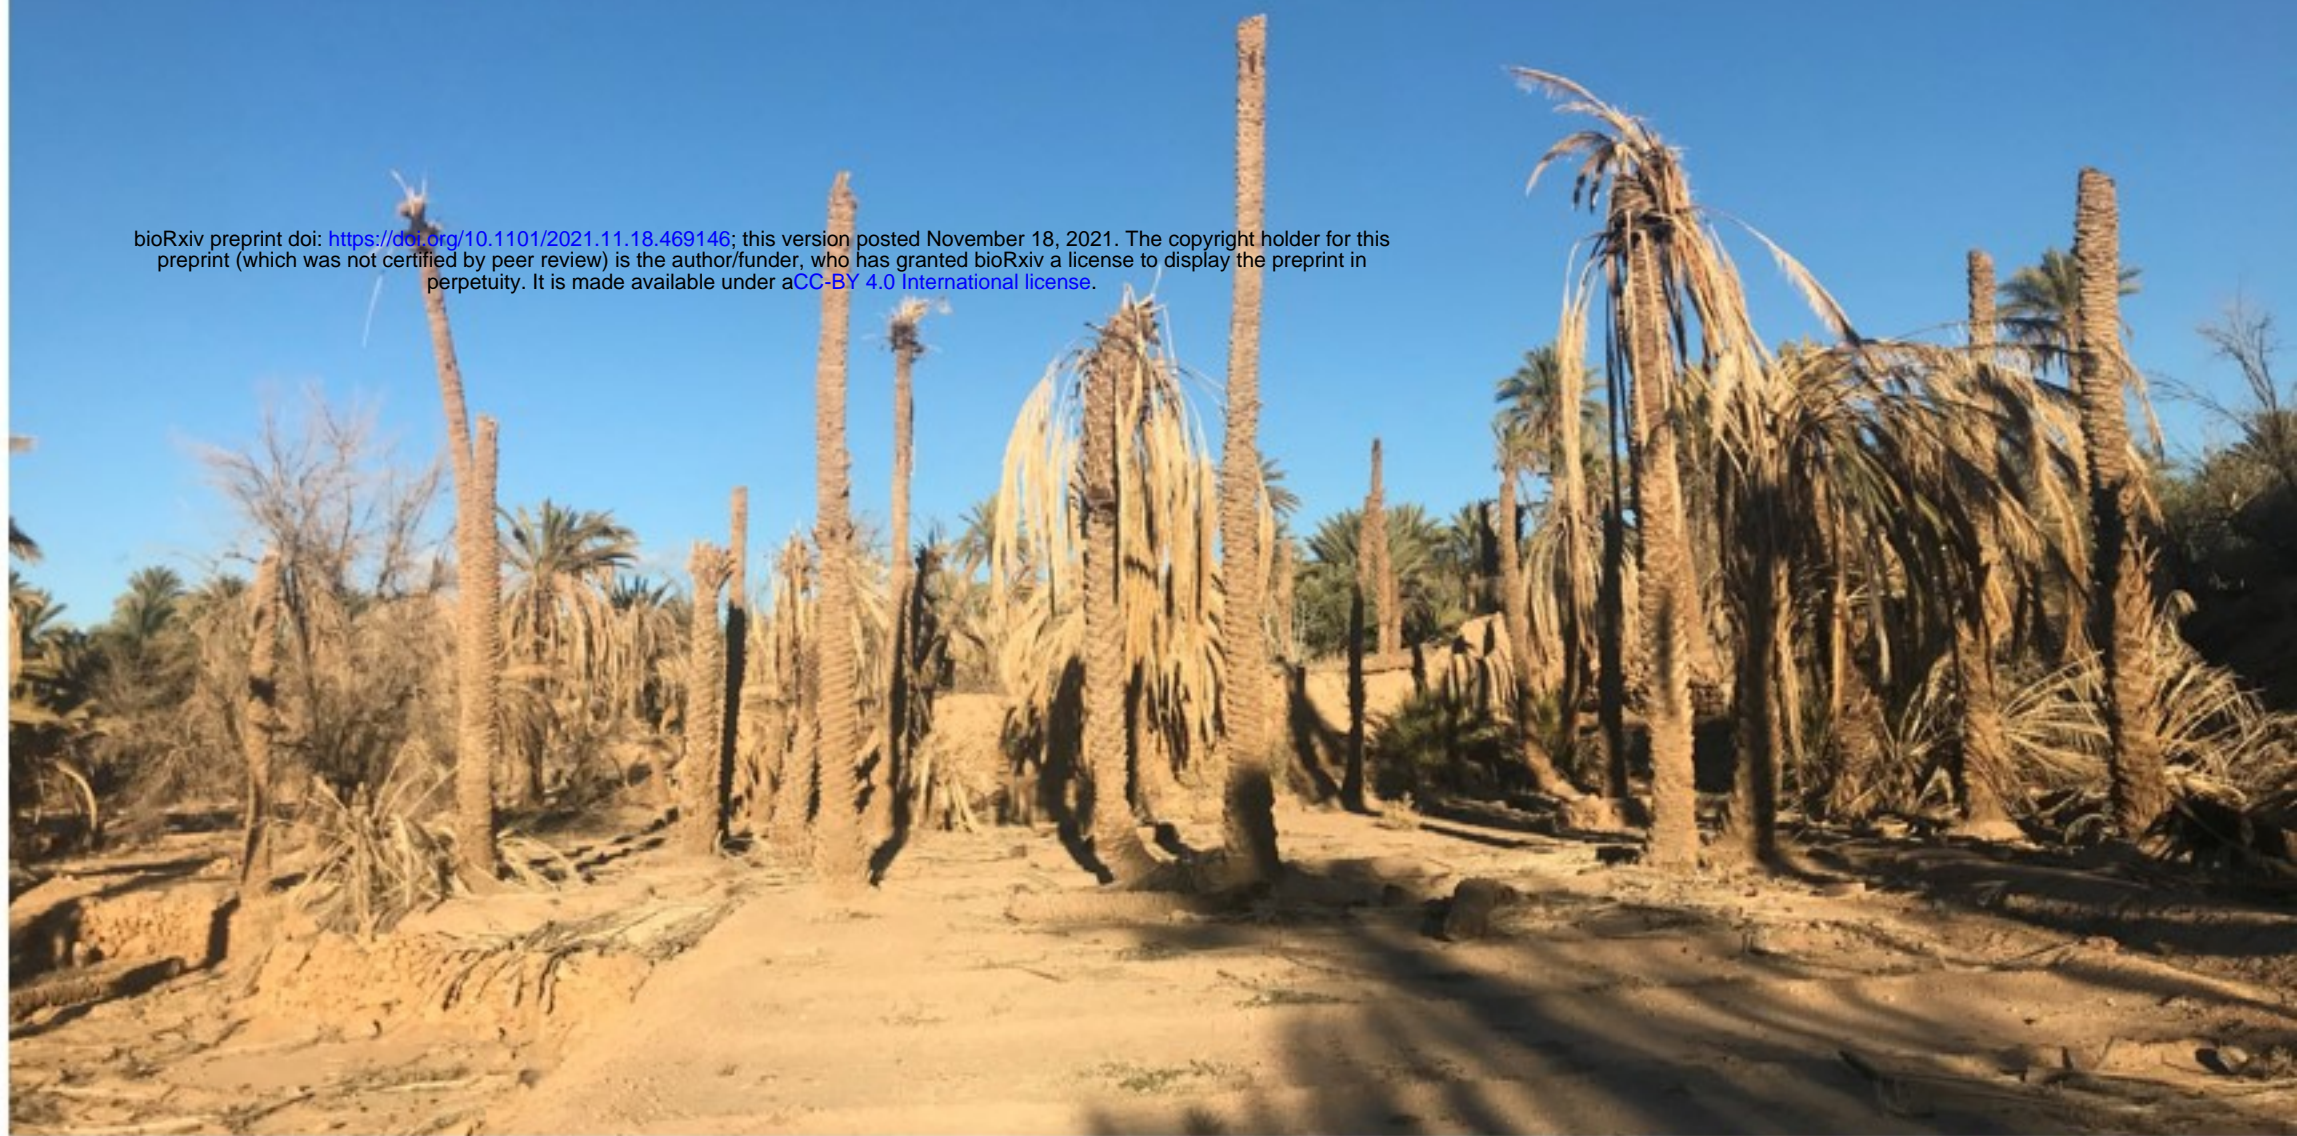

B

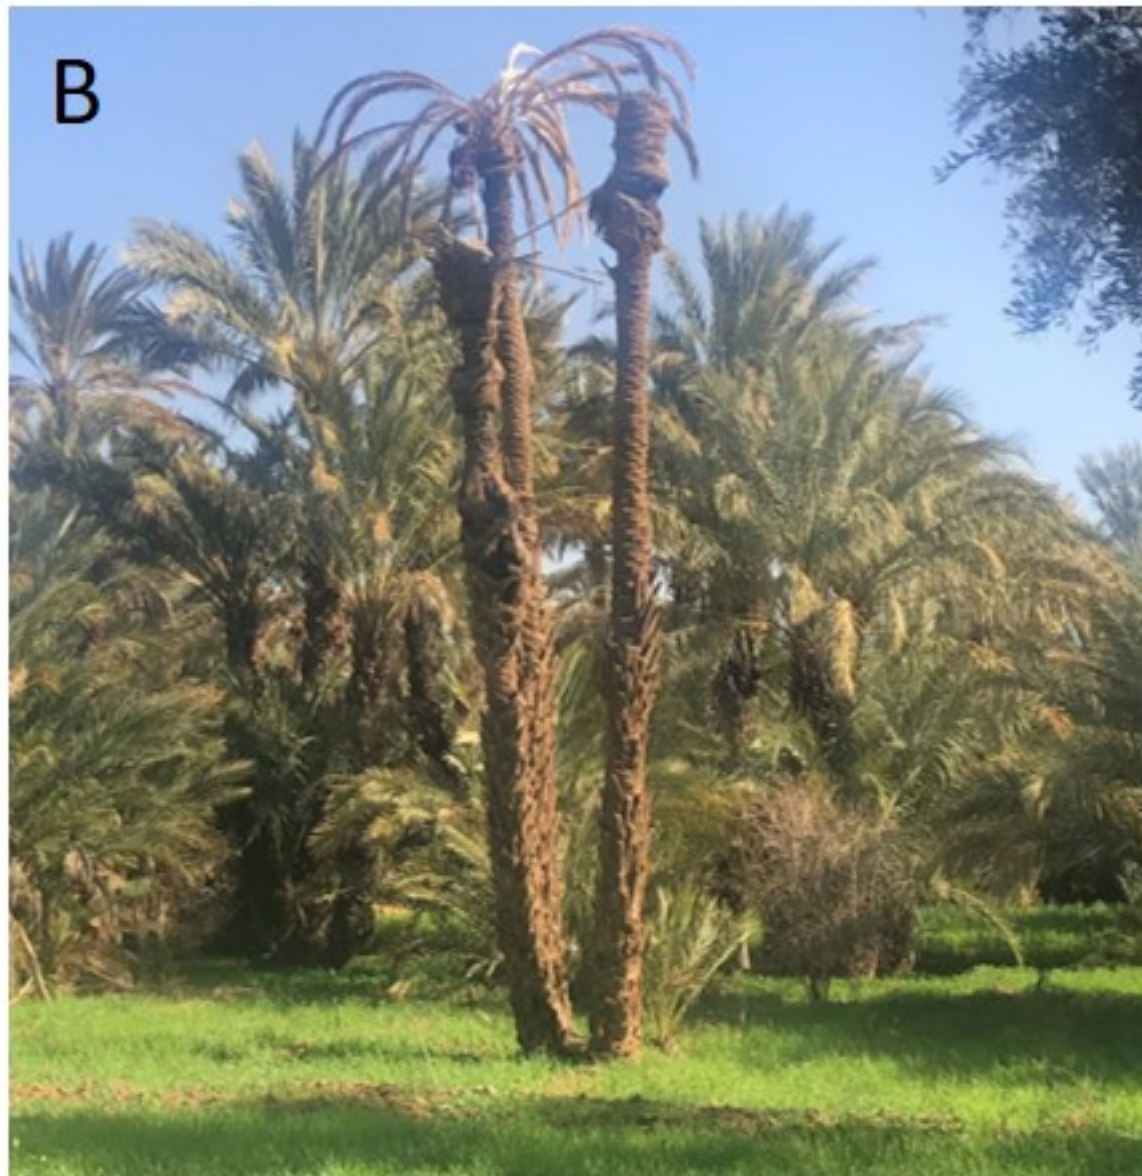

C

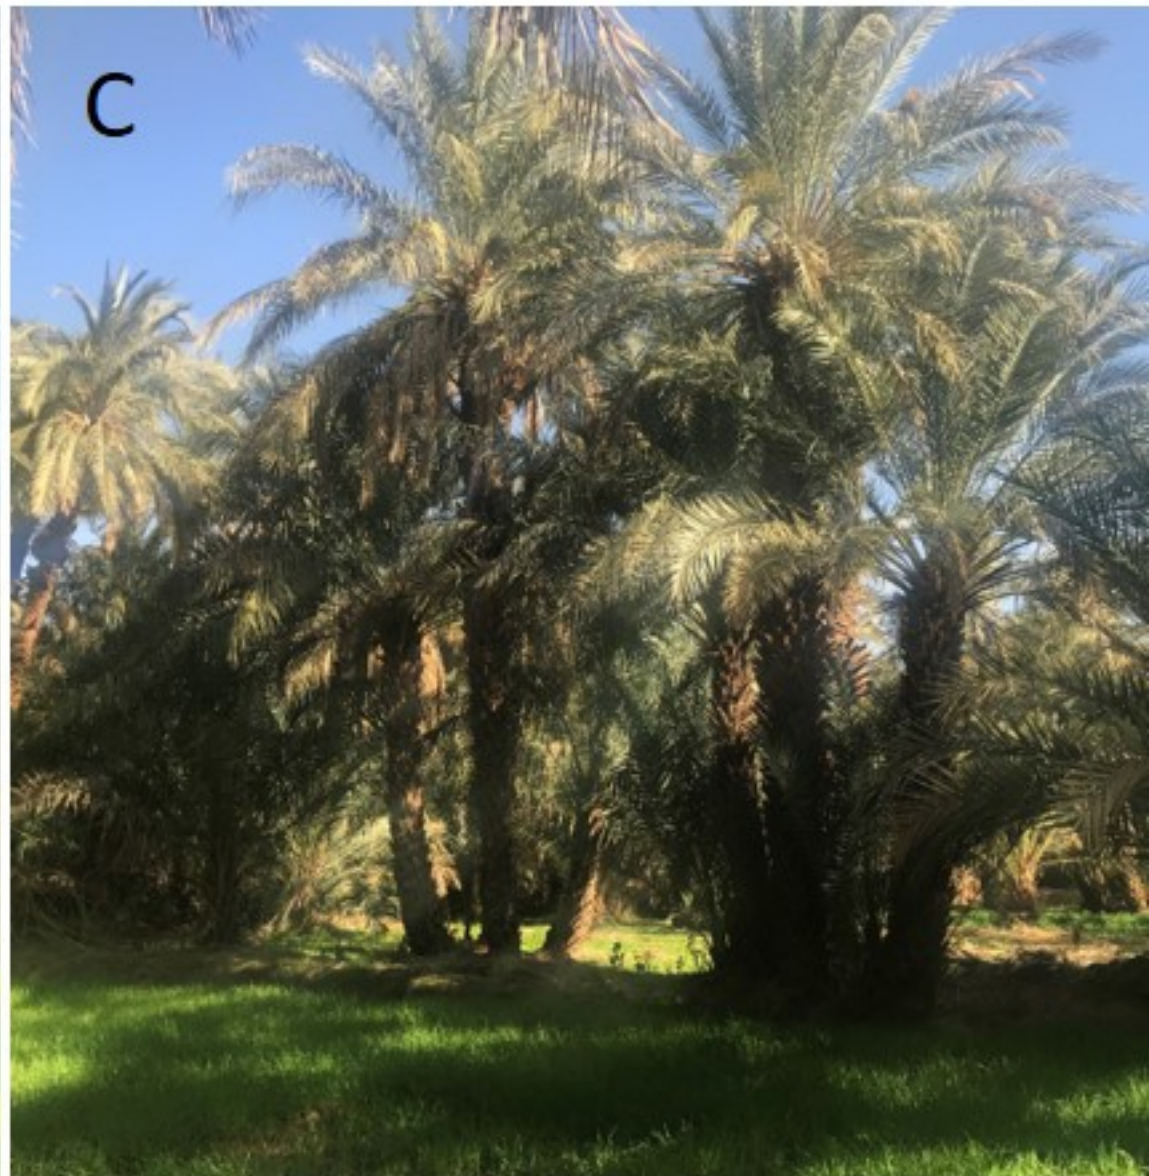

Figure 1



Table 3. Potential necrosis-inducing toxins encoded in the *F. oxysporum f. sp. albedinis* genome

| Protein ID    | pfam<br>accesssion | pfam names                                                    | pfam<br>evalues |
|---------------|--------------------|---------------------------------------------------------------|-----------------|
| FUN_007374-T1 | PF05630.10         | Necrosis inducing protein (NPP1)                              | 1.70E-53        |
| FUN_001358-T1 | PF05630.10         | Necrosis inducing protein (NPP1)                              | 1.10E-56        |
| FUN_000270-T1 | PF05630.10         | Necrosis inducing protein (NPP1)                              | 8.30E-65        |
| FUN_004711-T1 | PF14856.5          | Pathogen effector putative<br>necrosis-inducing factor (Hce2) | 1.50E-19        |
| FUN_009556-T1 | PF14856.5          | Pathogen effector putative<br>necrosis-inducing factor (Hce2) | 8.00E-30        |
| FUN_007640-T1 | PF14856.5          | Pathogen effector putative<br>necrosis-inducing factor (Hce2) | 5.9E-7          |

bioRxiv preprint doi: <https://doi.org/10.1101/2021.11.18.469146>; this version posted November 18, 2021. The copyright holder for this preprint (which was not certified by peer review) is the author/funder, who has granted bioRxiv a license to display the preprint in perpetuity. It is made available under aCC-BY 4.0 International license.

**Table 1: Emerging infectious plant diseases in natural oases**

| Species              | Disease                    | Pathogen                                      | References                                             |
|----------------------|----------------------------|-----------------------------------------------|--------------------------------------------------------|
| Phoenix dactylifera  | Bayoud disease             | Fusarium oxysporum f.sp. Albedinis            | (Toutain, 1965; Louvet and Toutain 1973 ; Sedra, 1992) |
| Phoenix dactylifera  | Brittle leaf disease       | Unknown                                       | (Namsi et al., 2007)                                   |
| Phoenix dactylifera  | Lethal yellowing disease   | Candidatus Phytoplasma palmae                 | (Harrison et al., 2008)                                |
| Phoenix dactylifera  | Inflorescence rot disease  | Mauginiella scaetiae                          | (Taxana and Larous, 2003)                              |
| Phoenix dactylifera  | Diplodia leaf-base disease | Diplodia phoenicum                            | (El-Deeb et al., 2007)                                 |
| Phoenix dactylifera  | Belaat disease             | Phytophthora palmivora                        | (Sedra, 2003)                                          |
| Phoenix dactylifera  | Black scorch disease       | Thielaviopsis punctulata                      | ( Al-Naemi et al., 2014)                               |
| Phoenix dactylifera  | Bending Head Disease       | Botryodiplodia theobromae                     | (Sedra, 2003)                                          |
| Citrus aurantifolia  | Witches' Broom disease     | Candidatus phytoplasma aurantifolia           | (Khan & Grosser, 2004)                                 |
| Olea europaea spp.   | Root rot disease           | Cylindrocarpon destructans, Phytophthora spp. | (Zazzerini and Marte, 1976 ; SIPAM, 2008)              |
| Malus pumila         | Fire Blight disease        | Erwinia amylovora                             | (Fatmi et al., 2008 ; SIPAM, 2008)                     |
| Solanum lycopersicum | Tomato wilt                | Fusarium oxysporum f. sp. Lycopersici         | (SIPAM, 2008 ; Murugan et al., 2020)                   |
| Solanum melongena    | Root-knot disease          | Meloidogyne arenaria                          | (SIPAM, 2008 ; Mokrini et al., 2019)                   |
| Vitis vinifera       | Pierce's disease           | Xylella fastidiosa                            | (Choi et al., 2013)                                    |

## References :

- Al-Naemi, F. A., Nishad, R., Ahmed, T. A., and O. R. (2014). First Report of Thielaviopsis punctulata Causing Black Scorch Disease on Date Palm in Qatar. APS Journals.
- Choi, H. K., Iandolino, A., Da Silva, F. G., & Cook, D. R. (2013). Water deficit modulates the response of vitis vinifera to the Pierce's disease pathogen xylella fastidiosa. Molecular Plant-Microbe Interactions, 26(6), 643–657. <https://doi.org/10.1094/MPMI-09-12-0217-R>
- El-Deeb, H. M., Lashin, S. M., & Arab, Y. A. (2007). Distribution and pathogenesis of date palm fungi in Egypt. Acta Horticulturae, 736, 421–429. <https://doi.org/10.17660/ActaHortic.2007.736.39>
- Fatmi, M., Bougsiba, M., & Saoud, H. (2008). First Report of Fire Blight Caused by Erwinia amylovora on Pear, Apple, and Quince in Morocco. Plant Disease, 92(2), 314. <https://doi.org/10.1094/PDIS-92-2-0314A>
- Harrison, N. A., Helmick, E. E., & Elliott, M. L. (2008). Lethal yellowing-type diseases of palms associated with phytoplasmas newly identified in Florida, USA. Annals of Applied Biology, 153(1), 85–94. <https://doi.org/10.1111/j.1744-7348.2008.00240.x>
- Khan, I. A., & Grosser, J. W. (2004). Regeneration and characterization of somatic hybrid plants of Citrus sinensis (sweet orange) and Citrus micrantha, a progenitor species of lime. Euphytica, 137(2), 271–278. <https://doi.org/10.1023/B:EUPH.0000041591.65333.3c>
- Louvet J. et Toutain G. (1973). Recherches sur les fusarioses VII. Nouvelles observations sur les fusarioses du palmier dattier et précisions concernant la lutte. Ann. Phytopathol. 5 :35-52.
- Mokrini, F., El Aimani, A., Houari, A., Bouharroud, R., Wifaya, A., & Dababat, A. A. (2019). Meloidogyne arenaria attacking eggplant in Souss region, Morocco. Australasian Plant Disease Notes, 14(1), 28–31. <https://doi.org/10.1007/s13314-019-0360-7>
- Murugan, L., Krishnan, N., Venkataravanappa, V., Saha, S., Mishra, A. K., Sharma, B. K., & Rai, A. B. (2020). Molecular characterization and race identification of Fusarium oxysporum f. sp.



lycopersici infecting tomato in India. 3 Biotech, 10(11), 1–12. <https://doi.org/10.1007/s13205-020-02475-z>

Namsi, A. A., Montarone, M., Serra, P., Mahamoud, O. Ben, Takrouni, M. L., Khoualdia, O., Bové, J. M., Journal, S., & March, N. (2007). MANGANESE AND BRITTLE LEAF DISEASE OF DATE PALM TREES Published by: Springer Stable URL : <https://www.jstor.org/stable/41998366> REFERENCES Linked references are available on JSTOR for this article : reference # references \_ tab \_ contents You may need to log in to JSTOR to access the linked references . 89(1), 125–136.

Sedra M. H. 2003. Date palm cultivation, characterization and classification of main Mauritanian varieties. Edit AQAD, Al-Khartoum, 276 pages (in Arabic).

bioRxiv preprint doi: <https://doi.org/10.1101/2021.11.18.460145>; this version posted November 18, 2021. The copyright holder for this preprint (which was not certified by peer review) is the author/funder, who has granted bioRxiv a license to display the preprint in perpetuity. It is made available under aCC-BY 4.0 International license.

Sedra My.H. (1992a). Variabilité dans le pouvoir pathogène des isolats et souches du *Fusarium oxysporum* f. sp. *albedinis*, agent de la fusariose vasculaire (bayoud) du palmier dattier. Séminaire sur "Les interactions plantes microorganismes". IFS-ORSTOM. Dakar, Sénégal, 204-213

SIPAM. (2008). Plan de travail national du site SIPAM-Oasis historique de Gafsa.

Taxanna, A and Larous, L. (2003) Fungi associated with Khamedj disease. Eighth Arab congress of Plant Protection, 19-23 November, El Beida, Libya (Abstract).

Toutain, G. (1965). Note Sur L ' Epidémiologie Du Bayoud En Afrique Du Nord. AL-Awamia, 37–45. <https://www.inra.org.ma/sites/default/files/01503.pdf>

Zazzerini, A. and Marte, M. *Cylindrocarpon destructans* (Zins.) Scholten probabile agente di una nuova malattia dell'Olivo (*Olea europaea* L.). *Phytopathol. Medit.*, 1976, 15, 90–97.



Table 2. Composition of the predicted secretome of *F. oxysporum* f. sp. *albedinis*

| Class                     | Number of proteins |
|---------------------------|--------------------|
| Secreted                  | 1464               |
| Less than 500 amino acids | 1077               |
| No identified pfam domain | 598                |
| Cysteine rich             | 550                |
| Cazymes                   | 386                |
| Repeat containing         | 370                |

bioRxiv preprint doi: <https://doi.org/10.1101/2021.11.18.469146>; this version posted November 18, 2021. The copyright holder for this preprint (which was not certified by peer review) is the author/funder, who has granted bioRxiv a license to display the preprint in perpetuity. It is made available under aCC-BY 4.0 International license.
